# Supplementary material
Source: publisher figshare collection journal article supplement (https://aacr.figshare.com/ndownloader/files/39874570)
Supplement: Supplementary file 1 [file 39874570]

## Sheet: Sheet1
	ATF2-0	ATF2-3	ATF2-6	ATF2-12	ATF2-24	ATF2-48	JNK-0	JNK-3	JNK-6	JNK-12	JNK-24	JNK-48	HSP27-0	HSP27-3	HSP27-6	HSP27-12	HSP27-24	HSP27-48	p38-0	p38-3	p38-6	p38-12	p38-24	p38-48	ERK-0	ERK-3	ERK-6	ERK-12	ERK-24	ERK-48	p53-0	p53-3	p53-6	p53-12	p53-24	p53-48	MEK1-0	MEK1-3	MEK1-6	MEK1-12	MEK1-24	MEK1-48	MSK1-0	MSK1-3	MSK1-6	MSK1-12	MSK1-24	MSK1-48	STAT1-0
C_21_DMSO	-0.957427	-0.534193	0.305879	0.447158	0.0367513	-0.354492	0.957427	0.736663	1.65184	1.9166	1.61482	1.30844	0.957427	0.381277	0.932307	0.655027	0.37794	-0.224566	0.957427	0.0662947	0.36191	0.6521	1.00695	0.102273	-0.957427	1.19348	1.43573	1.47983	1.54183	0.719142	0.957427	-0.50632	-0.365458	-0.461811	-0.460724	-0.411439	0.957427	0.656755	0.820744	1.16965	1.31517	1.06554	-0.957427	0.844812	1.49054	1.05142	0.323367	1.5039	-0.957427
C_21_G+P	-0.957427	1.30347	1.39471	2.15452	2.04582	0.715959	0.957427	-0.109014	0.246159	0.852045	1.36171	0.933019	0.957427	-0.477806	0.466952	0.65428	1.21925	-0.0605439	0.957427	0.981131	1.88912	1.59108	1.52803	0.827613	-0.957427	-1.4269	-1.3973	-0.704454	1.55733	1.42693	0.957427	-0.461648	-0.41356	-0.466288	-0.384828	-0.277005	0.957427	-1.02479	-1.01103	-1.06257	-0.525629	0.232966	-0.957427	-1.35905	-0.0366367	-0.116438	1.37028	-0.367254	-0.957427
C_21_TMZ	-0.957427	0.340975	-0.605314	-0.618658	-0.741438	0.971459	0.957427	1.92451	1.36953	0.741552	0.25986	1.66762	0.957427	2.282	2.08725	2.34553	0.968452	2.76725	0.957427	1.96809	1.32433	1.72171	1.09333	2.55447	-0.957427	1.5228	1.47229	1.95254	0.613878	1.58965	0.957427	1.5231	1.92894	1.91086	2.11223	2.61543	0.957427	1.56578	1.95613	1.55183	0.758454	1.1597	-0.957427	1.43757	0.657533	0.905436	0.0730183	2.39023	-0.957427
C_1_DMSO	-0.957427	-2.14736	-0.439948	-0.354389	-0.162057	-0.559646	0.957427	-0.00687192	0.747079	0.998471	0.924048	0.187605	0.957427	-0.489047	-0.69027	0.414649	0.0868425	-0.597953	0.957427	-0.759713	-0.792497	-0.166905	-0.0481567	-0.655906	-0.957427	0.320605	0.481839	-0.000492698	-0.278164	-0.798938	0.957427	-0.5178	-0.430444	-0.566036	-0.614414	-0.634208	0.957427	0.431854	0.689654	0.74275	1.30734	0.509543	-0.957427	-0.112726	0.26417	1.05142	-0.268366	-0.810421	-0.957427
C_1_G+P	-0.957427	-1.25165	-0.509188	1.11778	1.41635	0.861533	0.957427	-0.755309	-0.703083	0.491219	1.0092	-0.489928	0.957427	-0.940266	-1.01007	-0.657146	0.542103	-0.601227	0.957427	-0.00893387	0.333647	0.00925632	0.160011	-0.332611	-0.957427	-1.68442	-1.55889	-0.773394	1.18422	0.977942	0.957427	-0.502837	-0.556919	-0.605147	-0.704704	-0.642448	0.957427	-1.18731	-1.24052	-1.12093	-0.284826	1.38744	-0.957427	-1.48064	-1.91089	-0.26242	0.232331	-0.293393	-0.957427
C_1_TMZ	-0.957427	-0.79681	-1.58016	-1.24373	-1.21649	0.238438	0.957427	1.18631	0.685335	0.168913	-0.15853	1.04325	0.957427	0.994277	0.915956	0.495772	1.0338	0.128354	0.957427	0.697331	0.077198	0.266209	-0.193632	0.140626	-0.957427	0.96862	0.685924	-0.00300894	-0.918699	-0.436978	0.957427	2.16207	2.01825	1.94932	1.33567	0.992897	0.957427	1.81477	1.19865	1.05872	0.681706	0.517682	-0.957427	1.34638	1.25915	0.133817	0.118536	-0.0471891	-0.957427
S_21_DMSO	0.957427	0.792987	0.876288	-0.161445	-0.437087	-0.973912	-0.957427	-0.364805	0.0439027	-0.795214	-0.627226	-0.766425	-0.957427	-0.319639	-0.174519	-0.422001	-1.38013	-0.603495	-0.957427	-1.01169	-0.846712	-1.14162	-1.07145	-0.859306	0.957427	0.369422	0.593688	-0.204628	-0.187412	-0.37219	-0.957427	-0.731627	-0.709513	-0.679211	-0.70953	-0.614255	-0.957427	-0.190337	-0.227125	-0.106312	-0.112546	0.00513419	0.957427	1.1032	0.356726	-0.179002	-0.83734	-0.441115	0.957427
S_21_G+P	0.957427	0.272375	1.67473	0.726036	1.14181	1.45445	-0.957427	-1.19422	-1.13049	-0.849894	-0.634638	-0.686754	-0.957427	-0.839103	-1.19771	0.0165112	-0.234355	-0.176578	-0.957427	-0.274455	0.515284	0.398845	1.09916	0.0511884	0.957427	-0.0439589	-0.394731	-1.17164	-0.84502	-0.365061	-0.957427	-0.775051	-0.73067	-0.652433	-0.688132	-0.573735	-0.957427	-0.994224	-0.736998	-1.26543	-1.64554	-1.66459	0.957427	-0.903075	-1.263	-2.60856	-0.814581	-0.342634	0.957427
S_21_TMZ	0.957427	0.486135	-0.578156	-0.913227	-0.492729	-0.370466	-0.957427	0.70541	0.0954827	-0.605393	-0.525762	-0.116761	-0.957427	1.02679	0.416825	-0.315831	0.0785254	1.08342	-0.957427	0.942403	0.0180781	-0.252744	-0.281208	0.566755	0.957427	0.477836	0.360701	0.971497	0.110062	0.434734	-0.957427	0.748433	0.204254	0.481325	1.07059	0.722379	-0.957427	0.104484	0.109203	0.0721963	-0.0260505	-0.471276	0.957427	-0.143124	0.0559192	0.46749	2.10995	0.51908	0.957427
S_1_DMSO	0.957427	0.70648	0.45173	-0.130927	-0.51161	-1.57159	-0.957427	-0.789971	-0.715507	-0.640761	-0.9849	-1.18514	-0.957427	-0.777281	-1.13874	-1.21491	0.437744	-0.599968	-0.957427	-1.5676	-1.61266	-1.42429	-1.46875	-1.08162	0.957427	-0.649802	-0.296562	-0.0220338	-0.711032	-1.43045	-0.957427	-0.728144	-0.729754	-0.721635	-0.699154	-0.652201	-0.957427	-0.302847	-0.305362	0.153138	0.0779987	-0.578452	0.957427	-0.35591	-0.429999	-0.199856	0.0730183	-0.514976	0.957427
S_1_G+P	0.957427	0.804789	0.22706	0.168792	-0.24847	0.92327	-0.957427	-1.4393	-1.58638	-1.31002	-1.23069	-0.935369	-0.957427	-0.914775	-0.0801616	-1.2022	-1.51004	-0.591246	-0.957427	-0.759709	-0.178835	-0.656478	-0.653398	-0.407837	0.957427	-0.475908	-0.649273	-1.19958	-1.25003	-0.643266	-0.957427	-0.724266	-0.728508	-0.716643	-0.789952	-0.663334	-0.957427	-1.01492	-1.14682	-1.23397	-1.83167	-1.49686	0.957427	-0.416707	0.49556	-0.731648	-1.52011	-0.908903	0.957427
S_1_TMZ	0.957427	0.022798	-1.21762	-1.19191	-0.830861	-1.335	-0.957427	0.106591	-0.703872	-0.967515	-1.0079	-0.959566	-0.957427	0.0735724	-0.527825	-0.769671	-1.62014	-0.523452	-0.957427	-0.273151	-1.08887	-0.997167	-1.17089	-0.905643	0.957427	-0.57177	-0.733423	-0.324628	-0.816969	-1.10152	-0.957427	0.514093	0.513385	0.527699	0.532948	0.137921	-0.957427	0.140792	-0.106521	0.0409322	0.285591	-0.666824	0.957427	0.0392641	-0.939057	0.488344	-0.860099	-0.687319	0.957427
C: control shRNA
S: SHP2 shRNA
21: 21% oxygen
1: 1% oxygen
[truncated: 208 more columns]
